# Supplementary material for: Megathrust reflectivity reveals the updip limit of the 2014 Iquique earthquake rupture
Source: Springer Nature journal article supplement (doi:10.1038/s41467-022-31448-4), 2022-07-08
Supplement: MOESM1 [file 41467_2022_31448_MOESM1_ESM.pdf]

1 **Supporting information**

2 **“Megathrust reflectivity reveals**  
3 **the updip limit of the 2014 Iquique earthquake rupture”**

4

5 **Bo Ma<sup>1\*</sup>, Jacob Geersen<sup>1,2</sup>, Dietrich Lange<sup>1</sup>, Dirk Klaeschen<sup>1</sup>, Ingo Grevemeyer<sup>1,2</sup>,**  
6 **Eduardo Contreras-Reyes<sup>4</sup>, Florian Petersen<sup>1</sup>, Michael Riedel<sup>1</sup>, Yueyang Xia<sup>1\*</sup>,**  
7 **Anne M. Tréhu<sup>3</sup>, and Heidrun Kopp<sup>1,2</sup>**

8 <sup>1</sup> GEOMAR Helmholtz Centre for Ocean Research Kiel, Germany

9 <sup>2</sup> Institute of Geosciences, Kiel University, Kiel, Germany

10 <sup>3</sup> Oregon State University, College of Earth, Ocean, and Atmospheric Sciences,  
11 Corvallis, USA

12 <sup>4</sup> Departamento de Geofísica, Facultad de Ciencias Físicas y Matemáticas, Universidad  
13 de Chile, Santiago, Chile

14 \* Corresponding author: B. Ma ([bma@geomar.de](mailto:bma@geomar.de)), Y. Xia ([yxia@geomar.de](mailto:yxia@geomar.de))

15

16 **1. Seismic Processing**

17 Seismic data processing was conducted with the Schlumberger OMEGA2 software.  
18 Here we present the processing sequences and the corresponding results in terms of seismic  
19 line MC04. The same processing strategy is used for all profiles to eliminate the possibility that  
20 differences in reflectivity are due to differences in processing. An overview of the processing  
21 scheme is shown below (Suppl. Fig. 1). The main seismic processing included four steps:

22

23 **A. Step1: Processing Geometry Implementation**

24 In this step, the seismic data are exposed to a series of pre-processing modules of the  
25 Schlumberger OMEGA2 software, including sail extract module, geometry crooked module,  
26 geometry update module and grid define module, aiming to implement the processing  
27 geometry. In particular, the sail extract module is used to merge the geometry survey file  
28 information with the seismic traces. The geometry crooked module analyses the location of  
29 detectors, sources, and midpoints and projects them onto a smooth 2-D crooked common-mid-  
30 point (CMP) profile. Subsequently, the geometry update module and the grid define module  
31 were used to update the seismic trace header literals to the new processing grid. These pre-  
32 processing steps prepare the seismic data set for further analysis. Seismic shooting was  
33 conducted at an interval of 125 m to avoid interference from the previous shot on large offset  
34 OBS data. Due to the large shot interval, the original CMP gathers are imaged with prominent  
35 spatial aliasing. The aliasing has serious effects on the performance of multichannel data  
36 analysis processes such as f-k filtering. Because of spatial aliasing, these processes can perceive  
37 events with steep dips at high frequencies as different from what they are and, hence, do not  
38 treat them properly.

39

40 **B. Step2: Increase Vertical Resolution and General Noise Cleaning**

41 In this step, four modules were used to increase the vertical resolution and clean the  
42 general noise. In particular, the deconvolution module is applied to compress the basic wavelet,  
43 thus increasing temporal resolution. The direct wave cleaning module was employed in shallow  
44 seafloor areas to enhance near-surface wide-angle reflections. Attenuation of random noise  
45 (RNA) was applied by a predictive deconvolution in the  $f_x$ -domain. The anomalous amplitude  
46 attenuation (AAA) removed high amplitude events such as marine swell, rig and ship noise by  
47 transforming the seismic data into frequency bands and applying a spatial median filter. These  
48 pre-processing steps yield CMP gathers (Suppl. Fig. 2a) which will be interpolated in the next  
49 step.

50

51 **C. Step3: Shot Interpolation**

52 To avoid prominent spatial aliasing between neighboring shots resulting from the large  
53 shot interval, shot-ordered seismic data were interpolated three times from 125 m to 15.625 m  
54 by f-k trace interpolation. As the result is not a multiple of the receiver interval, an irregular  
55 interpolator module was used to interpolate it to 12.5 m, where aliased components have been  
56 eliminated (Suppl. Fig. 2b).

57

58 **D. Step 4: Multiple attenuation**

59 Prior to multiple attenuation, the plate boundary reflection is severely obscured by  
60 multiples (Suppl. Fig. 3a). The multiples were predicted by surface related multiple elimination  
61 (SRME) using wavefield inversion based on the Kirchhoff integral and subtracted from the raw  
62 data after shot interpolations. After the multiple attenuation, we applied the f-k filtering to  
63 remove the high frequencies to enhance the image (Suppl. Fig. 3b). The plate boundary  
64 reflection is clearly observed in the travel time range where the first multiple occurs and we can  
65 now trace the plate boundary interface further landward on the time section of seismic line  
66 MC04 (Suppl. Fig. 4). The extensive data volume generated by the shot interpolations led to  
67 long calculation times in the pre-stack time domain and the pre-stack depth domain, so we  
68 reconstructed the offsets of CMP gathers with an increment of 100 m. After the reconstruction  
69 of offset distances, a preliminary  $v_p$  model based on an unpublished 3D  $v_p$  model from ocean  
70 bottom seismometers (OBS) during cruise MGL1610 of the *R/V Marcus G. Langseth* in 2016  
71 was applied for the pre-stack depth migration. Referring to the OBS velocity field, we  
72 calculated the velocity gradient starting from the seafloor to yield an initial velocity model  
73 (Suppl. Fig. 5) for application to the multichannel seismic profiles. Although this initial velocity  
74 model is not sufficiently confining the shallow depth ( $< 8$  km below seafloor) and may produce  
75 an inaccuracy of 1-2 km in the depth of the plate boundary compared to an accurate velocity  
76 model, it does not affect the spatial distribution of the reflectivity. In the meanwhile, this initial  
77 velocity does not enable to carry out amplitude analysis at shallow depth. However, our main  
78 focus is on the reflectivity pattern and the lateral coherence and continuity of the plate boundary

79 reflectivity. The pre-stack depth migrated seismic images are not significantly affected by  
80 seafloor multiples anymore and resolve sub-seafloor structures in the upper plate and  
81 subducting lower plate at high resolution (Suppl. Fig. 6).

82

### 83 **E. Step 5: Amplitude calibration**

84 To quantify the amplitudes of the seismic sections, the reflection coefficient was  
85 estimated based on the ratio of the seafloor reflection to the seafloor multiple reflection. Due to  
86 interference of several reflector elements resulting in inverse and mix phased signals especially  
87 in the crustal overburden the envelope was calculated representing the absolute reflection  
88 strength (Suppl. Fig. 7). The plate boundary shows a unique reflection strength of 0.005 to  
89 0.0075 in a depth range between 15 to 35 km, whereas the internal crustal reflector elements  
90 show a higher variability ranging from 0.0075 to 0.025 at a depth range of 5 to 15 km.

91

## 92 **2. Thermal Model Setup**

93 It has long been recognized that the rupture zone of subduction zone megathrust  
94 earthquakes is at least partially controlled by the thermal state of the fault zone<sup>1,2</sup>. Analytical  
95 models reveal that the geometry of the subduction zone, the thermal state of the incoming  
96 subducting plate and the shear or frictional heating along the megathrust are critical parameters  
97 controlling megathrust temperatures<sup>3,4</sup>, which in turn, define the seaward and landward limit of  
98 large subduction earthquakes rupture zones. The seaward or updip limit is generally associated  
99 with temperatures of 100°-150°C, marking the smectite to chlorite transition<sup>2</sup> or a suite of  
100 diagenetic reactions and release of water from underthrust sediments<sup>5</sup> and/or basement<sup>6</sup>. The  
101 landward or downdip limit is assumed to be associated with a critical temperature of 350°-  
102 400°C, which marks the transition from stick-slip to stable sliding at the onset of quartz and  
103 feldspar plasticity of continental crustal rocks<sup>7</sup>.

104

105 The geometry of the subduction zone is readily known from geophysical data or the  
106 hypocentral depth of large megathrust earthquakes and the basal heat flow is defined by the age

107 of the incoming oceanic plate. Most thermal parameters of subduction zones show little  
 108 variation along the Pacific Ring of Fire and are well established, especially for Chile<sup>8,9</sup>. Based  
 109 on these data, most subduction zones have been studied using two-dimensional thermal models.  
 110 Here, we use two different approaches. First, we calculate the thermal state along the plate  
 111 interface or megathrust fault using analytical solutions based on the formalism of ref.<sup>4</sup> and  
 112 second, we consider a 2-dimensional thermal model of ref.<sup>10</sup> for northern Chile, incorporating  
 113 corner flow in the mantle wedge.

114 Analytical expressions, which relate surface heat flux to temperature, geometrical  
 115 constraints, and shear stress, provide an efficient approach to study the thermal state of the  
 116 megathrust fault and are discussed in detail by refs.<sup>3,4,11</sup>. We follow the approach of ref.<sup>4</sup> and  
 117 first calculate the temperature  $T_f$  as a function of the depth  $z$  on the interplate fault zone as:

$$118 \quad (1) \quad T(z) = K_m T_0 z / SK_s [\pi \kappa (t_0 + t_s)]^{1/2}$$

119 where  $S(z) = 1 + bK_m [(V_n z \sin \delta) / \kappa]^{1/2} / K_s$ .  $K_m$  ( $3.3 \text{ Wm}^{-1}\text{K}^{-1}$ ) and  $K_s$  ( $2.55 \text{ Wm}^{-1}\text{K}^{-1}$ ) are the  
 120 mantle and forearc thermal conductivity, respectively.  $T_0$  is the asthenospheric mantle  
 121 temperature ( $1300^\circ\text{C}$ ) and  $\kappa$  is the thermal diffusivity ( $10^{-6} \text{ m}^2 \text{ s}^{-1}$ ).  $t_0$  is the average age of the  
 122 subducting plate ( $50 \text{ Myr}^{12}$ ), whereas  $t_s$  is the time it takes the lithosphere to subduct to a depth  
 123  $z$ .  $V_n$  is the convergence rate normal to the subduction ( $\sim 70 \text{ km/Myr}$ ),  $\delta$  is the dip angle of  
 124 subduction, and  $b(\pi^{-1/2})$  is a factor that depends on the specific geometry<sup>11</sup>.

125

126 The dip angle of subduction was taken directly from the seismic reflection images (Fig.  
 127 2), and the time  $t_s$  is computed by dividing the integrated downdip length of the fault surface by  
 128  $V_n$ <sup>13</sup>. We neglect the effect of the horizontal heat flow. To calculate the radiogenic heat  
 129 production  $T_r$  in the forearc crust we used the following expression<sup>13</sup>:

$$130 \quad (2) \quad T_r(z) = A_r z^2 / (2K_s S(z))$$

131 where  $A_r$  is the radiogenic heat production rate ( $10^{-6} \text{ Wm}^{-3}$ )<sup>14</sup>. Radiogenic heat production adds  
 132  $0\text{-}45^\circ\text{C}$  to the fault temperature from the trench axis up to the downdip limit.

133

134 Further, we include in our model frictional shear heating  $T_{sh}(z)$  on the thermal field by  
135 using:

$$136 \quad (3) T_{sh}(z) = \tau(z)V_t z/(K_s S(z))$$

137 where  $\tau(z)$  is the shear stress on the fault and  $V_t$  is the total slip rate<sup>4,11</sup>.  $\tau(z)$  on a gently dipping  
138 fault at shallow depth is approximately

$$139 \quad (4) \tau(z) = \mu(\sigma_n(z) - p(z))$$

140 where  $\mu$  is the friction coefficient,  $\sigma_n$  is the normal stress applied on the fault plane  
141 (approximately the overburden pressure), and  $p$  is the pore fluid pressure. Following ref.<sup>13</sup>, we  
142 use  $\mu = 0.85$ ,  $\sigma_n(z) = \rho g z$  and  $p(z) = 0.95 \sigma_n(z)$  with acceleration of gravity  $g = 9.8 \text{ ms}^{-2}$  and the  
143 average crustal density  $\rho = 2500 \text{ kgm}^{-3}$ .

144

145 The final predicted temperature on the fault plate boundary  $T_f(z)$  is the sum of Eqs. (1)-(3)  
146 (i.e.,  $T_f(z) = T(z) + T_r(z) + T_{sh}(z)$ ). Fig. 2 shows the estimated temperature values for  $T_f(z)$  along  
147 our seismic reflection lines.

148

149 We compare our model to the numerical model of ref.<sup>10</sup>. The geometry of this model is  
150 based on a suite of geophysical data<sup>15</sup> and thermal parameters were rated against a number of  
151 observed features, including the maximum depth of subduction thrust earthquakes and observed  
152 heat flow. Interestingly, the maximum depth of seismic faulting of megathrust earthquakes in  
153 northern Chile occurs at 40-50 km<sup>16,17</sup>, suggesting that temperatures of 350°-400°C are reached  
154 at ~40-50 km, too. To mimic this feature, ref.<sup>10</sup> had to introduce a considerable amount of shear  
155 heating, in the order of  $\tau = 33 \text{ MPa}$  to  $\tau = 67 \text{ MPa}$ , with the upper limit providing a better fit to  
156 the data. The predictions from the  $\tau = 67 \text{ MPa}$  model mimic the prediction of our preferred  
157 analytic solution down to a depth of approx. 30 km. At greater depth, the models differ with  
158 the ref.<sup>10</sup> model showing somewhat lower temperatures. The observed differences may stem  
159 from the effects of the asthenospheric corner flow incorporated into the numerical model and a

160 change in dip angle, which is not considered in the analytic model. We also compare our model  
161 with other thermal models from the Northern Chilean margin. A comparison of all the models  
162 for the temperature along the plate interface is shown in Suppl. Fig. 9, including the thermal  
163 model with shear stress  $\tau=67$  MPa<sup>10</sup> as the black dashed line, the thermal model with frictional  
164 heating we used in the main text as the red dashed line, the thermal model with shear stress  
165  $\tau=33$  MPa<sup>10</sup> as the orange dashed line, the thermal model of ref.<sup>18</sup> as the magenta dashed line,  
166 and a thermal model we built without the frictional heating as the green dashed line. Please note  
167 that for the study of the up-limit limit at shallow depth ( $\sim 15$  km) and its correlation to the  
168 reflectivity pattern of the seismic data, the model we established with frictional heating and the  
169 model with shear stress  $\tau=67$  MPa of ref.<sup>10</sup> show consistent features.

170

171 As previously mentioned in the main text, the established new thermal model uses a  
172 friction coefficient  $\mu=0.85$  and pore fluid pressure  $\lambda=0.95$ <sup>13</sup>. Since these values vary in each  
173 tectonic setting, we applied different  $\mu_b$  in the new analytical thermal model in Suppl. Fig. 10.  
174 The effective coefficient of basal friction  $\mu_b$  depends on both the friction coefficient  $\mu$  and pore  
175 fluid pressure  $\lambda$  along the fault zone:  $\mu_b = \mu(1-\lambda)$ <sup>19</sup>. Based on this formula, the  $\mu_b$  of the model  
176 in our main text is 0.0425, which is shown as the red dashed line. We applied a range of  $\mu_b$  from  
177 0.03-0.13, consistent with the global thermal measurement<sup>20</sup>. In this range, the predictions depth  
178 of the analytical model ( $< 20$  km) is close to the downdip limit of the megathrust reflectivity  
179 ( $\sim 15$  km) observed from MCS images at the upper threshold of the clay dehydration  
180 temperature of 150°C (Suppl. Fig. 10). Moreover, the thermal model and reflectivity show a  
181 better spatial matching with a higher effective coefficient of basal friction  $\mu_b$  value.

182

183 An interesting feature is that the models for northern Chile show larger frictional heating  
184 compared to those observed in south-central Chile<sup>8,9,14</sup>. However, already ref.<sup>9</sup> suggested that  
185 frictional heating at the plate boundary increases northward, perhaps mimicking the increasing  
186 age of the subducting plate. Furthermore, patterns are consistent with heat flow anomalies over

187 the marine forearc. Heat flow anomalies over the marine forearc are in the order of 50-60, 40-  
188 50, and 24-31 mW/m<sup>2</sup> at 39°S, 36°S and 33°S, respectively<sup>14</sup>, decreasing northward and hence  
189 reflecting increasing crustal age of the subducting plate and supporting a decrease of basal heat  
190 flow. At 21°S, however, the age of the subducting plate has increased by roughly 20 Myr with  
191 respect to 33°S, but the forearc heat flow is in the order of 30-40 mW/m<sup>21</sup> and thus higher than  
192 near 33°S, supporting higher values frictional heating than found further south. It might be  
193 reasonable to hypothesize that sediment starved subduction erosion supports a higher degree of  
194 friction than the accretionary margin of south-central Chile, but this interpretation is beyond  
195 the scope of our work.

196

197 Both our analytical model and the numeric 2D model of ref.<sup>10</sup> show higher temperatures  
198 along the subduction megathrust fault with respect to other models for northern Chile. For  
199 example, ref.<sup>18</sup> (Suppl. Fig.8, magenta dashed line) did not consider any frictional heating with  
200 the argument that in south-central Chile shear heating was low and therefore they obtained  
201 lower temperatures.

202

### 203 **3. Supplementary Discussion**

204 Reflection energy absorption, seismic processing parameters, differences of gun energy  
205 during seismic acquisition and shooting direction may all potentially cause a variation of  
206 reflectivity along the plate boundary. To allow a spatial comparison of the reflectivity and avoid  
207 issues caused by seismic processing, the same processing strategy is used for all profiles. In  
208 addition, we discuss the following issues:

209

#### 210 **A. Is the plate interface on seismic line MC04 visible to greater depth because of stronger** 211 **gun energy during data acquisition?**

212 The plate interface is traced to a depth of approximately 35 km on the northern dip line  
213 MC04 but disappears at shallower depth on the dip lines that run through the rupture area of



214 the 2014 Iquique earthquake. The acquisition geometry and gun array remained unchanged  
 215 during the survey, which covered seismic lines parallel to the trench as well as profiles in the  
 216 dip direction. Strike line MC30, which crosses the middle continental slope and is located  
 217 furthest from the trench axis, documents that the plate interface along the northern part of the  
 218 line can be traced to greater depth than along the southern part. This observation is augmented  
 219 by all seismic dip lines and seismic strike lines of our survey.

220  
 221  
 222

**B. Is the difference in the plate interface reflection strength caused by shooting direction?**

223 The shooting direction did not cause the observed differences of the plate interface  
 224 reflection as seismic dip lines MC04, MC 06, and MC25 were shot from west to east, while  
 225 seismic dip lines MC17 and MC23<sup>22</sup> were shot from east to west. There are at least two seismic  
 226 lines in the same direction, documenting that the shooting direction does not exert a major  
 227 influence.

228  
 229  
 230

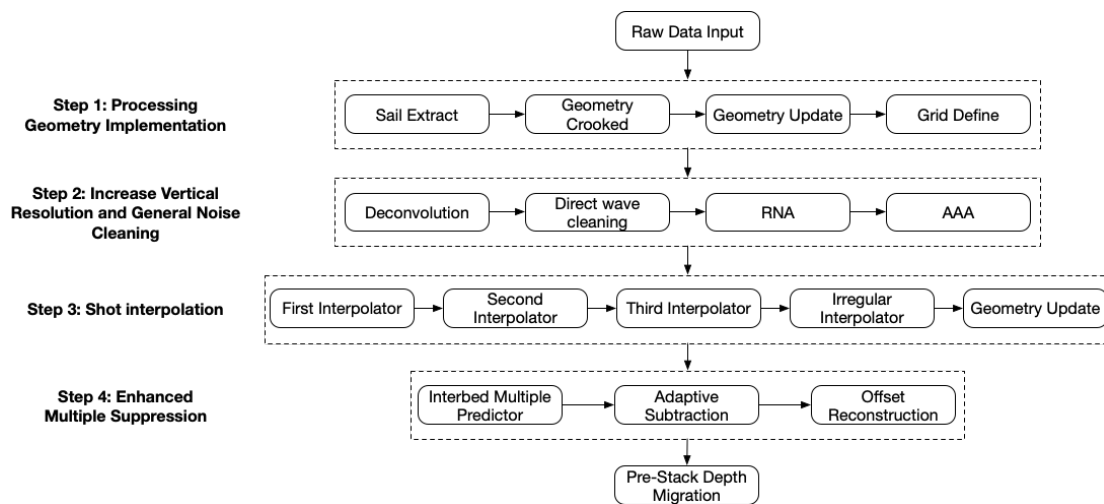

231  
 232  
 233  
 234

**Suppl. Fig. 1:** Overview of the processing sequence.

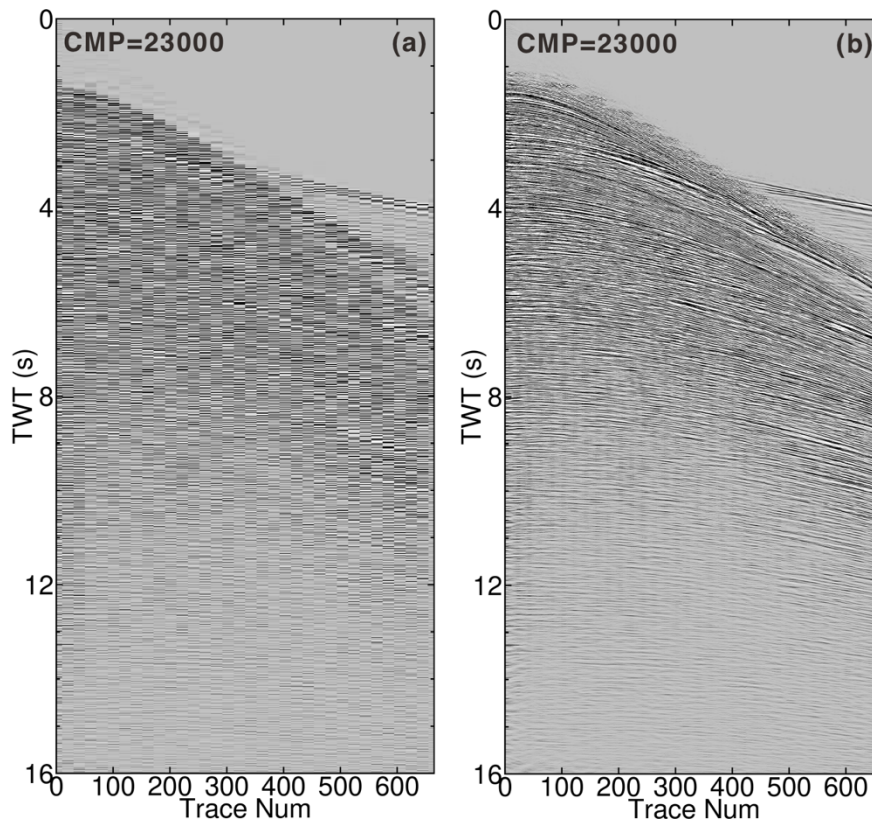

235

236

237 **Suppl. Fig. 2:** The CMP gathers before and after interpolation of seismic line MC04. Before  
238 the interpolation processing, the trace spacing is 250 m, which is shown in (a). After the  
239 interpolation processing the trace spacing is 25 m in (b).

240

241

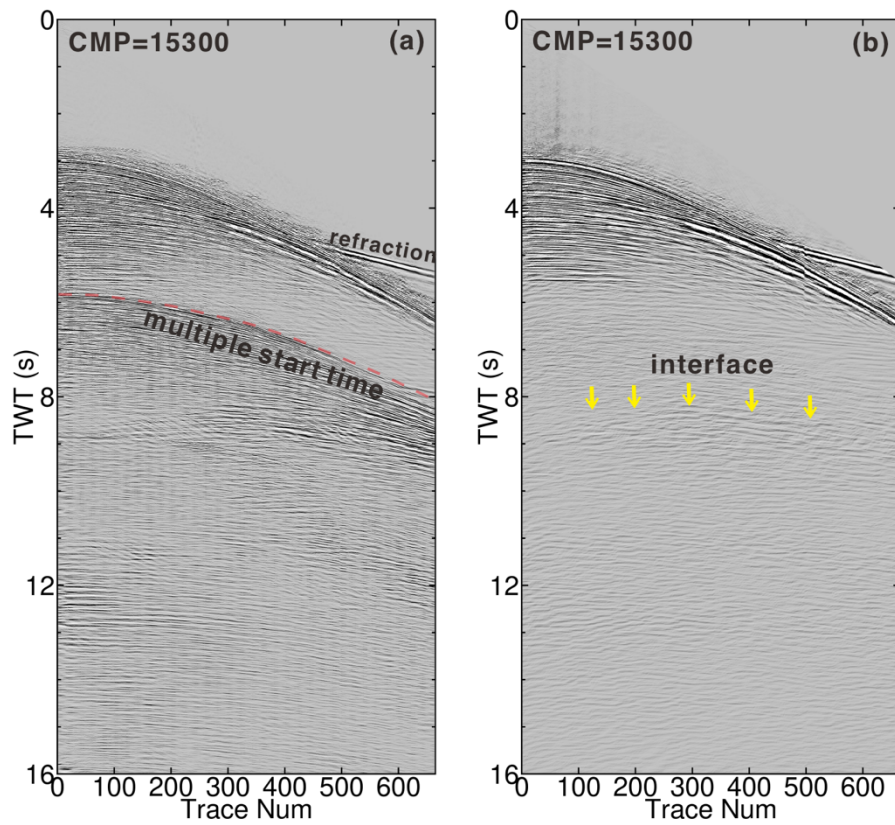

242

243 **Suppl. Fig. 3:** The CMP gathers before and after the de-multiple step of MC04. Before the  
 244 demultiple processing, seismic signals are obscured by several multiple orders below the  
 245 seafloor multiple start time indicated by the transparent red dashed line in (a). After the  
 246 demultiple processing and high frequencies elimination, the multiples are mostly eliminated  
 247 and we can see the interface traced by yellow arrows around 8-9 s TWT in (b).

248

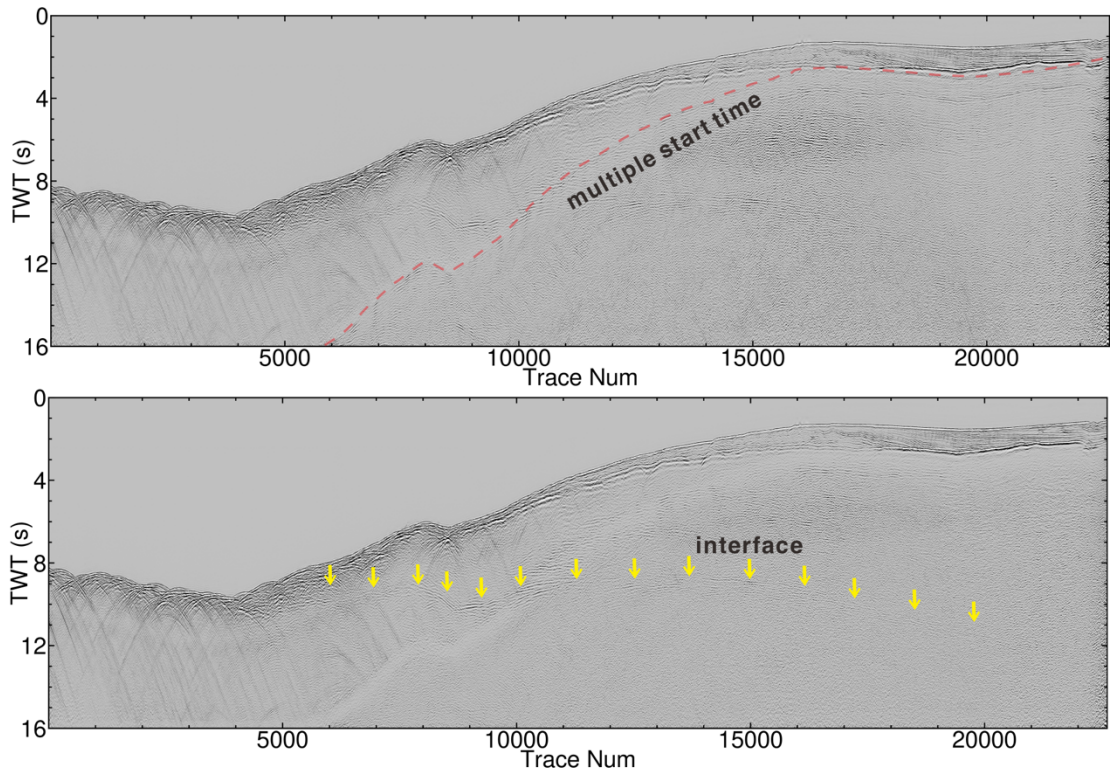

249  
 250 **Suppl. Fig. 4:** Stack section in the time domain of seismic line MC04 before and after the  
 251 demultiple processing. Before the demultiple processing, the interface reflection is obscured by  
 252 the multiples below the seafloor multiple start time indicated by the transparent red dashed line  
 253 in (a). After the demultiple processing, the interface reflection can be traced around trace  
 254 number 20000, as indicated by the yellow arrows in (b). Sections are shown after application  
 255 of a depth customized gain of amplitudes.

256  
 257  
 258  
 259

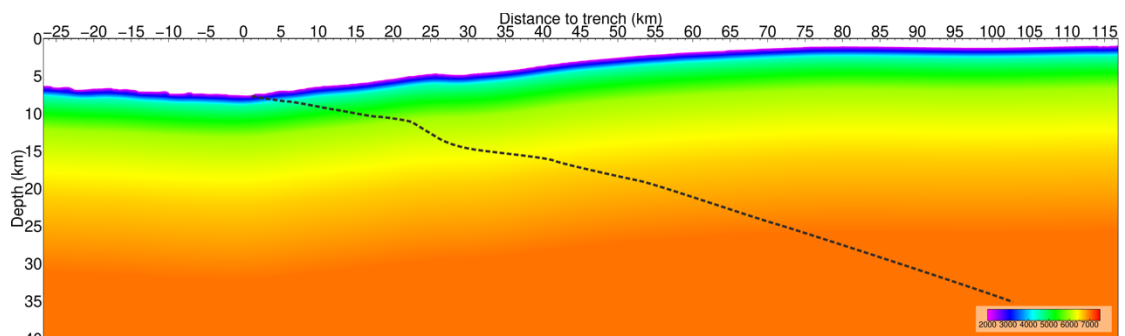

260  
 261 **Suppl. Fig. 5:** An initial velocity model based on an unpublished 3D OBS velocity model (K.  
 262 Davenport, personal communication) was applied for the pre-stack depth migration. The black  
 263 dashed line indicates the plate boundary of profile MC04.

264

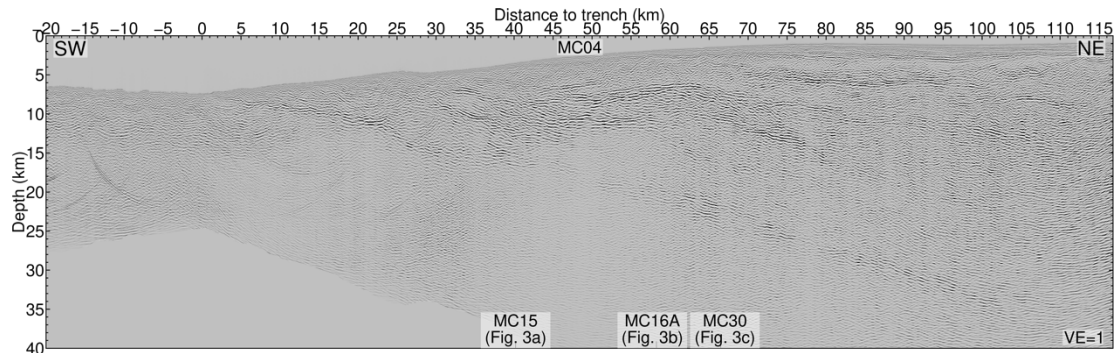

265

266

**Suppl. Fig. 6:** The pre-stack depth migrated seismic image of seismic line MC04.

267

268

269

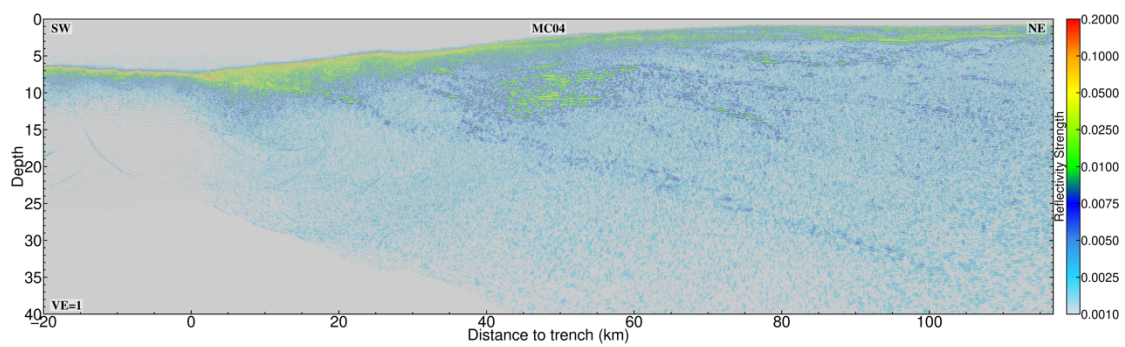

270

271

**Suppl. Fig. 7:** Estimated reflection strength of pre-stack depth migrated seismic image of

272

seismic line MC04. The plate boundary shows a unique reflection strength than the internal

273

crustal reflector elements. Vertical exaggeration is 1.

274

275

276

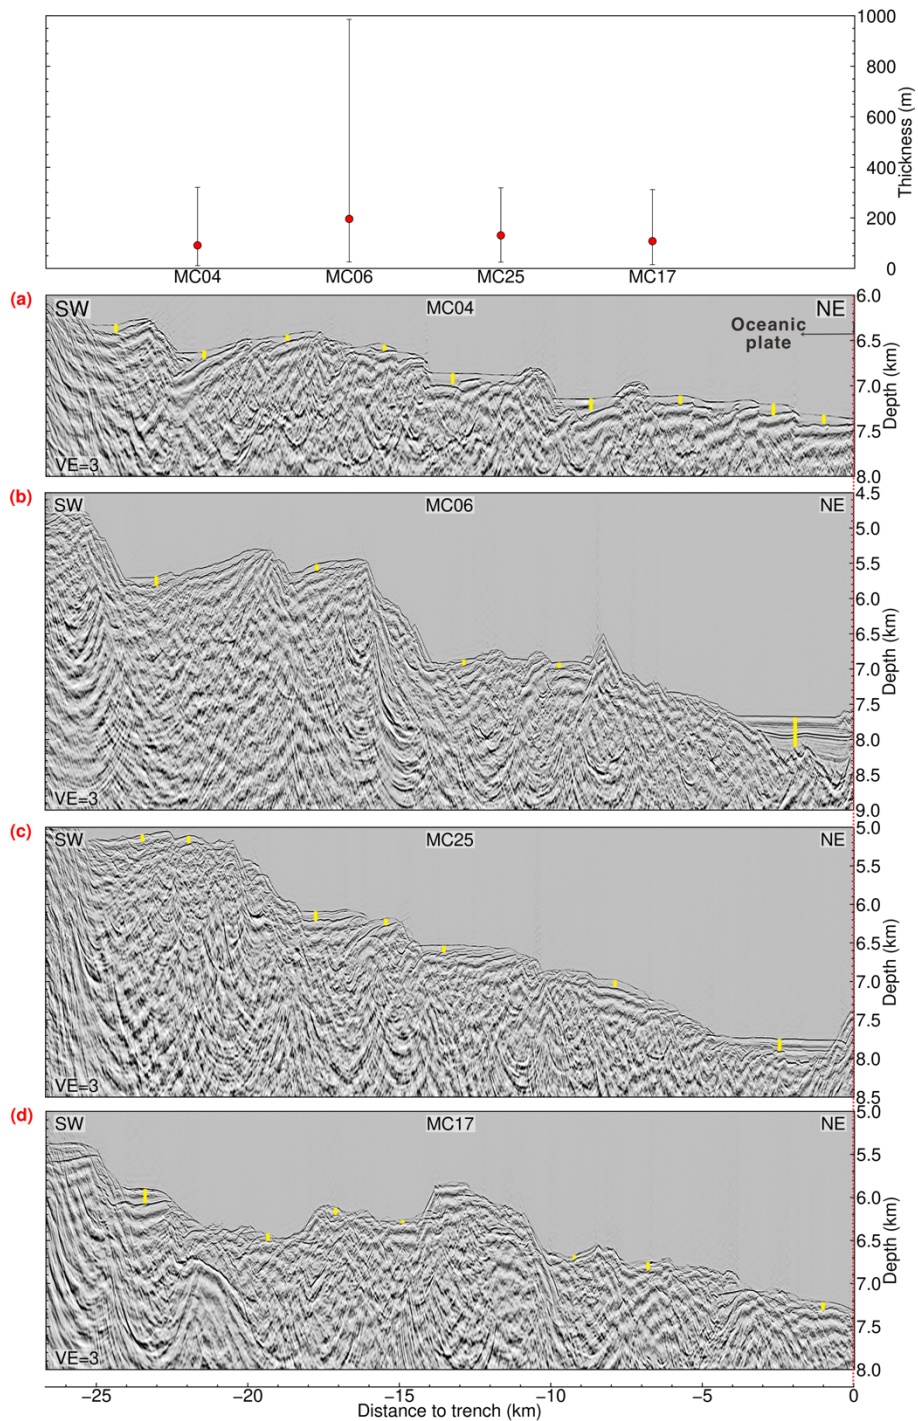

277

278 **Suppl. Fig. 8:** Oceanic crust of pre-stack depth migrated section along seismic dip-lines. The  
 279 error bar on top indicates the sediment upon the oceanic crust, in which the red dots show the  
 280 average thickness of sediment on oceanic crust. The upper limit of the error bar represents the  
 281 maximum thickness of sediments, while the lower limit indicates the minimum thickness of  
 282 sediment. The maximum thickness anomaly along MC06 is due to more sediment in the trench  
 283 than along the other seismic lines. In (a)-(d), yellow solid lines indicate the thickness of

284 sediment on oceanic crust. Due to the bending of the oceanic crust, the sediments are  
285 accumulated in half-graben structures. (a): seismic line MC04; (b): seismic line 06; (c): seismic  
286 line 25; (d): seismic line 17. Vertical exaggeration is 3.

287

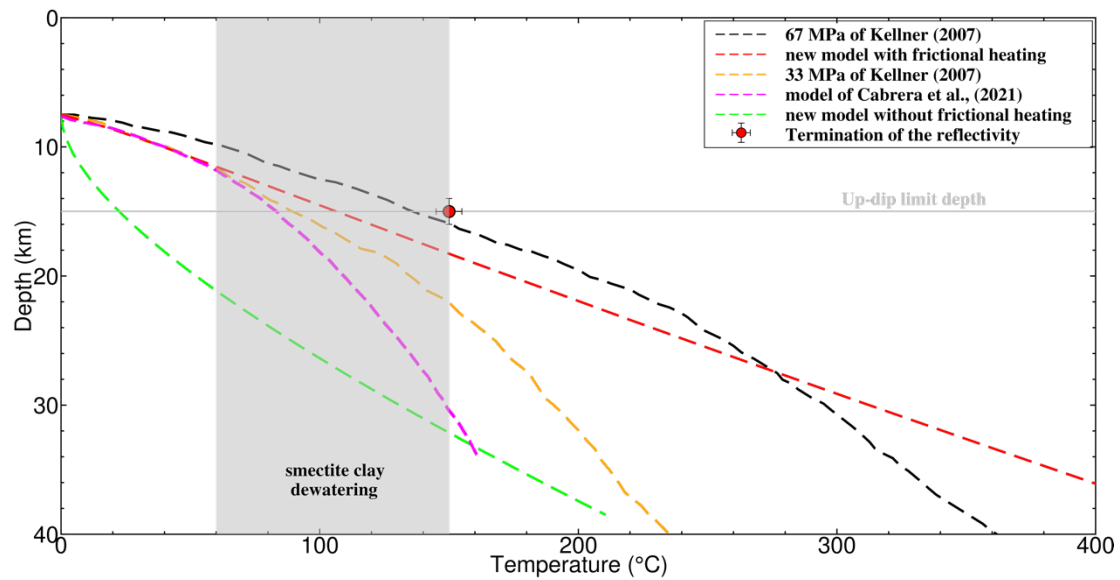

288

289 **Suppl. Fig. 9:** Comparison of different thermal models. Black dashed line: thermal model with  
290 shear stress  $\tau=67$  MPa<sup>10</sup>; red dashed line: thermal model with frictional heating discussed in  
291 main text; orange dashed line: thermal model with shear stress  $\tau=33$  MPa<sup>10</sup>; magenta dashed  
292 line: thermal model of ref.<sup>18</sup>; green dashed line: alternative thermal model computed without  
293 frictional heating. The approximate depth range of smectite clay dehydration is based on refs.<sup>5,23-</sup>  
294 <sup>26</sup>.

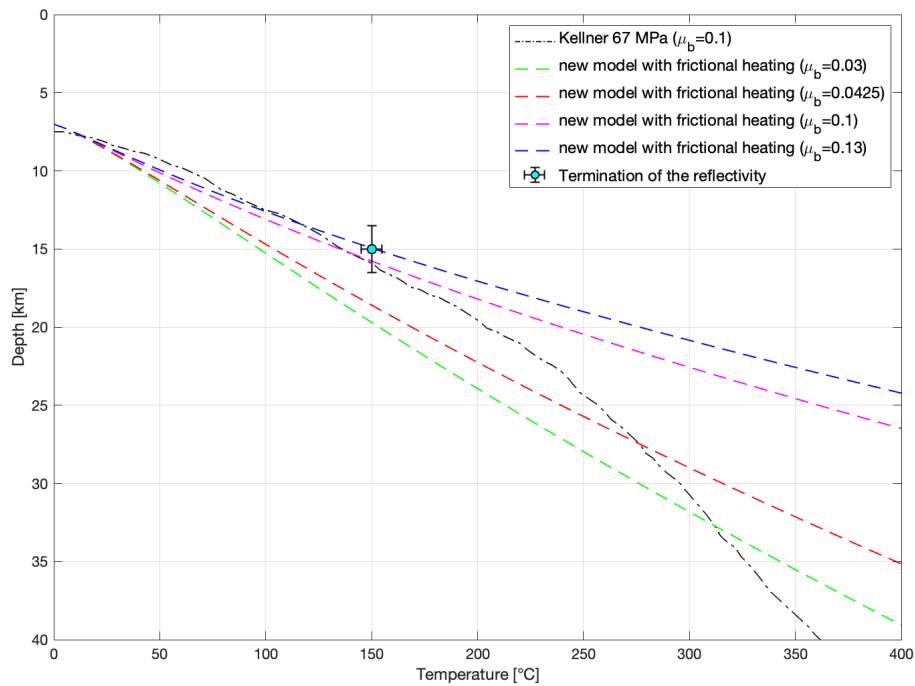

295

296 **Suppl. Fig. 10:** New thermal model with varying effective coefficient of basal friction  $\mu_b$   
 297 values. The range of  $\mu_b$  is from 0.03-0.13, consistent with the global thermal measurement<sup>20</sup>.  
 298 The estimated average basal friction  $\mu_b=0.1$  of Kellner 67 MPa is shown as a black dashed line.  
 299 Using the same basal friction value, our new analytical model is shown as a magenta dashed  
 300 line. In the main text, we used a friction coefficient of  $\mu=0.85$  and pore fluid pressure  $\lambda=0.95$ <sup>13</sup>.  
 301 The effective coefficient of basal friction  $\mu_b$  depends on both the friction coefficient  $\mu$  and pore  
 302 fluid pressure  $\lambda$  along the fault zone:  $\mu_b = \mu(1-\lambda)^{19}$ . Based on this formula, the  $\mu_b$  of the model  
 303 in our main text is 0.0425, which is shown as red dashed line.  $\mu_b=0.03$  and  $\mu_b=0.13$  are shown  
 304 as green and blue dashed lines, respectively.

305

## 306 References

307

308

- 309 1. Tichelaar, B. W. & Ruff, L. J. Depth of Seismic Coupling Along Subduction Zones. *J. Geophys.*  
 310 *Res.* **98**, 2017-2037 (1993).
- 311 2. Hyndman, R. D. & Wang, K. Thermal Constraints on the Zone of Major Thrust Earthquake  
 312 Failure - the Cascadia Subduction Zone. *J. Geophys. Res.* **98**, 2039-2060 (1993).
- 313 3. Molnar, P. & England, P. Temperatures, Heat-Flux, and Frictional Stress near Major Thrust  
 314 Faults. *J. Geophys. Res.* **95**, 4833-4856 (1990).



- 315 4. England, P. On Shear Stresses, Temperatures, and the Maximum Magnitudes of Earthquakes at  
316 Convergent Plate Boundaries. *J. Geophys. Res.* **123**, 7165-7202 (2018).
- 317 5. Spinelli, G. A. & Saffer, D. M. Along-strike variations in underthrust sediment dewatering on  
318 the Nicoya margin, Costa Rica related to the updip limit of seismicity. *Geophys. Res. Lett.* **31**,  
319 L04613 (2004).
- 320 6. Kameda, J. *et al.* A new source of water in seismogenic subduction zones. *Geophys. Res. Lett.*  
321 **38**, L22306 (2011).
- 322 7. Scholz, C. H. The Brittle-Plastic Transition and the Depth of Seismic Faulting. *Geol. Rundsch.*  
323 **77**, 319-328 (1988).
- 324 8. Völker, D., Grevemeyer, I., Stipp, M., Wang, K. & He, J. Thermal control of the seismogenic  
325 zone of southern central Chile. *J. Geophys. Res.* **116**, B10305 (2011).
- 326 9. Rotman, H. M. M. & Spinelli, G. A. Remarkably consistent thermal state of the south central  
327 Chile subduction zone from 36 degrees S to 45 degrees S. *J. Geophys. Res.* **119**, 3503-3516  
328 (2014).
- 329 10. Kellner, A. Different styles of deformation of the fore-arc wedge along the Chilean convergent  
330 margin: Insights from 3D numerical experiments. <https://doi.org/10.2312/GFZ.b103-07113>  
331 (Deutsches GeoForschungsZentrum GFZ, Potsdam, 2007).
- 332 11. Molnar, P. & England, P. Temperatures in Zones of Steady-State Underthrusting of Young  
333 Oceanic Lithosphere. *Earth Planet. Sci. Lett.* **131**, 57-70 (1995).
- 334 12. Muller, R. D., Sdrolias, M., Gaina, C. & Roest, W. R. Age, spreading rates, and spreading  
335 asymmetry of the world's ocean crust. *Geochem. Geophys. Geosyst.* **9** (2008).
- 336 13. McCaffrey, R., Wallace, L. M. & Beavan, J. Slow slip and frictional transition at  
337 low temperature at the Hikurangi subduction zone. *Nat. Geosci.* **1**, 316-320 (2008).
- 338 14. Grevemeyer, I., Diaz-Naveas, J. L., Ranero, C. R., Villinger, H. W. & Sci, O. D. P. L. Heat flow  
339 over the descending Nazca plate in central Chile, 32 degrees S to 41 degrees S: observations  
340 from ODP Leg 202 and the occurrence of natural gas hydrates. *Earth Planet. Sci. Lett.* **213**, 285-  
341 298 (2003).
- 342 15. Oncken, O. *et al.* Seismic imaging of a convergent continental margin and plateau in the central  
343 Andes (Andean Continental Research Project 1996 (ANCORP' 96)). *J. Geophys. Res.* **108**  
344 (2003).
- 345 16. Tichelaar, B. W. & Ruff, L. J. Seismic Coupling Along the Chilean Subduction Zone. *J.*  
346 *Geophys. Res.* **96**, 11997-12022 (1991).
- 347 17. Peyrat, S. *et al.* Kinematic rupture process of the 2007 Tocopilla earthquake and its main  
348 aftershocks from teleseismic and strong-motion data. *Geophys. J. Int.* **182**, 1411-1430 (2010).
- 349 18. Cabrera, L. *et al.* Northern Chile intermediate-depth earthquakes controlled by plate hydration.  
350 *Geophys. J. Int.* **226**, 78-90 (2021).
- 351 19. Hubbert, M. K. & Rubey, W. W. Role of Fluid Pressure in Mechanics of Overthrust Faulting:  
352 1. Mechanics of Fluid-Filled Porous Solids and Its Application to Overthrust Faulting. *Geol.*  
353 *Soc. Am. Bull.* **70**, 115-166 (1959).
- 354 20. Gao, X. & Wang, K. Strength of stick-slip and creeping subduction megathrusts from heat flow  
355 observations. **345**, 1038-1041 (2014).
- 356 21. Springer, M. & Forster, A. Heat-flow density across the Central Andean subduction zone.  
357 *Tectonophysics* **291**, 123-139 (1998).
- 358 22. Petersen, F. *et al.* Relationship Between Subduction Erosion and the Up-Dip Limit of the 2014  
359 Mw 8.1 Iquique Earthquake. *Geophys. Res. Lett.* **48**, e2020GL092207 (2021).
- 360 23. Saffer, D. M. & Tobin, H. J. Hydrogeology and Mechanics of Subduction Zone Forearcs: Fluid  
361 Flow and Pore Pressure. *Annu. Rev. Earth Planet. Sci.* **39**, 157-186 (2011).
- 362 24. Kastner, M., Elderfield, H. & Martin, J. B. Fluids in Convergent Margins - What Do We Know  
363 About Their Composition, Origin, Role in Diagenesis and Importance for Oceanic Chemical  
364 Fluxes. *Philos. Trans. Royal Soc. A.* **335**, 243-259 (1991).
- 365 25. Bekins, B., Mccaffrey, A. M. & Dreiss, S. J. Influence of Kinetics on the Smectite to Illite  
366 Transition in the Barbados Accretionary Prism. *J. Geophys. Res.* **99**, 18147-18158 (1994).
- 367 26. Underwood, M. B. Sediment Inputs to Subduction Zones: Why Lithostratigraphy and Clay  
368 Mineralogy Matter. in *The seismogenic zone of subduction thrust faults.* 42-85 (Columbia  
369 University Press, 2007).
- 370
